# Supplementary material
Source: PubMed Central journal article supplement (PMC3359064)
Supplement: NIHMS376971-supplement-1_si_001.pdf [file NIHMS376971-supplement-1_si_001.pdf]

Schneider et. al. Supporting Information Table S1

| Glycosylation   | Prediction Server                | Protein     | Position | Potential | Jury Agreement | Result                                          |
|-----------------|----------------------------------|-------------|----------|-----------|----------------|-------------------------------------------------|
| N-Glycosylation | NetNGlyc 1.0 Server <sup>1</sup> | CD8 alpha   | 49 NPTS  | 0.7113    | (9/9)          | Warning: Asn-Pro-X sequence. No site predicted. |
|                 |                                  |             | CD3 zeta |           |                | No sites predicted in this sequence.            |
|                 |                                  | CD3 delta   | 38 NTSI  | 0.6993    | (9/9)          | ++                                              |
|                 |                                  |             | 74 NGTD  | 0.6801    | (9/9)          | ++                                              |
|                 |                                  | CD3 gamma   | 52 NITW  | 0.6704    | (8/9)          | +                                               |
|                 |                                  |             | 92 NKSK  | 0.6890    | (9/9)          | ++                                              |
|                 |                                  | CD3 epsilon |          |           |                | No sites predicted in this sequence.            |
|                 |                                  | TCR alpha   | 93 NKSA  | 0.6532    | (9/9)          | ++                                              |
|                 |                                  |             | 173 NVSQ | 0.6240    | (8/9)          | +                                               |
|                 |                                  |             | 207 NKSD | 0.5314    | (6/9)          | +                                               |
|                 |                                  |             | 218 NNSI | 0.4418    | (7/9)          | -                                               |
|                 |                                  |             | 254 NLSV | 0.5313    | (6/9)          | +                                               |
|                 |                                  |             | TCR beta | 30 NITK   | 0.8176         | (9/9)                                           |
|                 |                                  | 37 NVTF     |          | 0.6997    | (9/9)          | ++                                              |
|                 |                                  | 203 NDSR    |          | 0.6317    | (9/9)          | ++                                              |
|                 |                                  |             |          |           |                |                                                 |
| O-Glycosylation | NetOGlyc 3.1 Server <sup>2</sup> | CD8 alpha   | 6 T      | 0.388     | 0.073          | N                                               |
|                 |                                  |             | 22 S     | 0.187     | 0.037          | N                                               |
|                 |                                  |             | 27 S     | 0.203     | 0.044          | N                                               |
|                 |                                  |             | 32 T     | 0.31      | 0.059          | N                                               |
|                 |                                  |             | 38 T     | 0.304     | 0.052          | N                                               |
|                 |                                  |             | 48 S     | 0.185     | 0.125          | N                                               |
|                 |                                  |             | 51 T     | 0.357     | 0.108          | N                                               |
|                 |                                  |             | 52 S     | 0.3       | 0.031          | N                                               |
|                 |                                  |             | 55 S     | 0.256     | 0.03           | N                                               |
|                 |                                  |             | 66 S     | 0.255     | 0.236          | N                                               |
|                 |                                  |             | 68 T     | 0.34      | 0.104          | N                                               |
|                 |                                  |             | 74 S     | 0.256     | 0.071          | N                                               |
|                 |                                  |             | 86 T     | 0.303     | 0.056          | N                                               |
|                 |                                  |             | 90 S     | 0.176     | 0.05           | N                                               |
|                 |                                  |             | 97 T     | 0.228     | 0.041          | N                                               |
|                 |                                  |             | 101 T    | 0.214     | 0.047          | N                                               |
|                 |                                  |             | 103 S    | 0.124     | 0.037          | N                                               |
|                 |                                  |             | 116 S    | 0.155     | 0.033          | N                                               |
|                 |                                  |             | 119 S    | 0.131     | 0.077          | N                                               |
|                 |                                  |             | 121 S    | 0.118     | 0.018          | N                                               |
| 126 S           | 0.25                             | 0.06        | N        |           |                |                                                 |
| 138 T           | 0.702                            | 0.568       | Y        |           |                |                                                 |
| 139 T           | 0.719                            | 0.354       | Y        |           |                |                                                 |

|           |       |       |       |   |
|-----------|-------|-------|-------|---|
|           | 140 T | 0.721 | 0.511 | Y |
|           | 147 T | 0.742 | 0.635 | Y |
|           | 151 T | 0.738 | 0.553 | Y |
|           | 154 S | 0.629 | 0.138 | Y |
|           | 158 S | 0.57  | 0.085 | Y |
|           | 174 T | 0.298 | 0.079 | N |
|           | 192 T | 0.121 | 0.074 | N |
|           | 199 S | 0.094 | 0.06  | N |
|           | 203 T | 0.149 | 0.068 | N |
|           | 224 S | 0.293 | 0.063 | N |
|           | 229 S | 0.426 | 0.208 | N |
|           | 231 S | 0.472 | 0.155 | N |
| CD3 zeta  | 8 T   | 0.374 | 0.092 | N |
|           | 19 T  | 0.233 | 0.061 | N |
|           | 23 S  | 0.159 | 0.074 | N |
|           | 47 T  | 0.148 | 0.144 | N |
|           | 56 S  | 0.156 | 0.079 | N |
|           | 58 S  | 0.166 | 0.041 | N |
|           | 124 S | 0.159 | 0.053 | N |
|           | 146 S | 0.174 | 0.043 | N |
|           | 147 T | 0.274 | 0.051 | N |
|           | 149 T | 0.301 | 0.072 | N |
|           | 152 T | 0.351 | 0.042 | N |
| CD3 delta | 4 S   | 0.332 | 0.023 | N |
|           | 5 T   | 0.436 | 0.031 | N |
|           | 8 S   | 0.298 | 0.071 | N |
|           | 14 T  | 0.337 | 0.065 | N |
|           | 17 S  | 0.225 | 0.167 | N |
|           | 20 S  | 0.245 | 0.027 | N |
|           | 39 T  | 0.337 | 0.036 | N |
|           | 40 S  | 0.226 | 0.022 | N |
|           | 42 T  | 0.297 | 0.069 | N |
|           | 47 T  | 0.255 | 0.049 | N |
|           | 50 T  | 0.26  | 0.165 | N |
|           | 53 S  | 0.202 | 0.054 | N |
|           | 56 T  | 0.285 | 0.029 | N |
|           | 76 T  | 0.231 | 0.031 | N |
|           | 84 S  | 0.146 | 0.019 | N |
|           | 85 T  | 0.2   | 0.075 | N |
|           | 95 S  | 0.231 | 0.019 | N |
|           | 103 T | 0.279 | 0.191 | N |
|           | 110 T | 0.265 | 0.222 | N |

|             |       |       |       |   |
|-------------|-------|-------|-------|---|
|             | 115 T | 0.247 | 0.327 | N |
|             | 130 T | 0.221 | 0.062 | N |
|             | 134 S | 0.175 | 0.073 | N |
|             | 139 T | 0.288 | 0.08  | N |
|             | 161 S | 0.195 | 0.055 | N |
| CD3 gamma   | 20 T  | 0.134 | 0.02  | N |
|             | 24 S  | 0.092 | 0.097 | N |
|             | 41 S  | 0.131 | 0.029 | N |
|             | 45 T  | 0.191 | 0.078 | N |
|             | 54 T  | 0.187 | 0.045 | N |
|             | 66 T  | 0.187 | 0.078 | N |
|             | 76 S  | 0.159 | 0.031 | N |
|             | 90 S  | 0.169 | 0.028 | N |
|             | 94 S  | 0.127 | 0.064 | N |
|             | 114 T | 0.163 | 0.03  | N |
|             | 116 S | 0.109 | 0.063 | N |
|             | 125 S | 0.11  | 0.057 | N |
|             | 145 S | 0.195 | 0.201 | N |
|             | 148 S | 0.209 | 0.034 | N |
|             | 152 T | 0.303 | 0.227 | N |
|             | 172 S | 0.167 | 0.047 | N |
| CD3 epsilon | 3 S   | 0.283 | 0.03  | N |
|             | 5 T   | 0.334 | 0.018 | N |
|             | 16 S  | 0.137 | 0.078 | N |
|             | 32 T  | 0.419 | 0.055 | N |
|             | 34 T  | 0.398 | 0.022 | N |
|             | 39 S  | 0.326 | 0.026 | N |
|             | 41 S  | 0.374 | 0.152 | N |
|             | 43 T  | 0.472 | 0.052 | N |
|             | 44 T  | 0.474 | 0.037 | N |
|             | 48 T  | 0.372 | 0.053 | N |
|             | 55 S  | 0.223 | 0.035 | N |
|             | 77 S  | 0.161 | 0.05  | N |
|             | 83 S  | 0.179 | 0.069 | N |
|             | 88 S  | 0.177 | 0.041 | N |
|             | 93 S  | 0.214 | 0.021 | N |
|             | 103 S | 0.171 | 0.145 | N |
|             | 129 S | 0.118 | 0.083 | N |
|             | 132 T | 0.161 | 0.068 | N |
|             | 141 T | 0.131 | 0.102 | N |
|             | 152 S | 0.145 | 0.055 | N |
|             | 163 T | 0.32  | 0.097 | N |

|           |       |       |       |   |
|-----------|-------|-------|-------|---|
| TCR alpha | 200 S | 0.242 | 0.054 | N |
|           | 8 S   | 0.163 | 0.029 | N |
|           | 21 S  | 0.183 | 0.034 | N |
|           | 34 S  | 0.203 | 0.041 | N |
|           | 36 S  | 0.174 | 0.049 | N |
|           | 38 S  | 0.153 | 0.071 | N |
|           | 45 S  | 0.139 | 0.036 | N |
|           | 52 T  | 0.146 | 0.056 | N |
|           | 54 S  | 0.092 | 0.017 | N |
|           | 71 T  | 0.211 | 0.138 | N |
|           | 75 S  | 0.218 | 0.048 | N |
|           | 77 S  | 0.195 | 0.035 | N |
|           | 78 S  | 0.191 | 0.037 | N |
|           | 89 T  | 0.244 | 0.068 | N |
|           | 95 S  | 0.155 | 0.021 | N |
|           | 100 S | 0.201 | 0.063 | N |
|           | 106 S | 0.187 | 0.609 | N |
|           | 111 S | 0.256 | 0.024 | N |
|           | 123 T | 0.364 | 0.031 | N |
|           | 125 S | 0.251 | 0.03  | N |
|           | 128 T | 0.32  | 0.079 | N |
|           | 131 T | 0.366 | 0.046 | N |
| 133 T     | 0.421 | 0.026 | N     |   |
| 138 T     | 0.362 | 0.271 | N     |   |
| 155 S     | 0.249 | 0.043 | N     |   |
| 157 S     | 0.229 | 0.025 | N     |   |
| 158 S     | 0.213 | 0.053 | N     |   |
| 161 S     | 0.228 | 0.024 | N     |   |
| 166 T     | 0.317 | 0.053 | N     |   |
| 170 S     | 0.261 | 0.037 | N     |   |
| 172 T     | 0.3   | 0.032 | N     |   |
| 175 S     | 0.207 | 0.395 | N     |   |
| 177 S     | 0.203 | 0.31  | N     |   |
| 180 S     | 0.224 | 0.024 | N     |   |
| 185 T     | 0.278 | 0.176 | N     |   |
| 188 T     | 0.3   | 0.019 | N     |   |
| 194 S     | 0.175 | 0.047 | N     |   |
| 199 S     | 0.187 | 0.049 | N     |   |
| 201 S     | 0.158 | 0.028 | N     |   |
| 206 S     | 0.162 | 0.092 | N     |   |
| 209 S     | 0.202 | 0.024 | N     |   |
| 220 S     | 0.271 | 0.021 | N     |   |

|          |       |       |       |   |
|----------|-------|-------|-------|---|
|          | 226 T | 0.389 | 0.033 | N |
|          | 230 S | 0.293 | 0.05  | N |
|          | 233 S | 0.336 | 0.019 | N |
|          | 234 S | 0.345 | 0.053 | N |
|          | 243 S | 0.247 | 0.042 | N |
|          | 246 T | 0.247 | 0.052 | N |
|          | 248 T | 0.194 | 0.019 | N |
|          | 256 S | 0.082 | 0.028 | N |
|          | 275 T | 0.205 | 0.081 | N |
|          | 280 S | 0.258 | 0.049 | N |
|          | 281 S | 0.292 | 0.018 | N |
| TCR beta | 3 T   | 0.28  | 0.043 | N |
|          | 4 S   | 0.196 | 0.026 | N |
|          | 21 T  | 0.204 | 0.049 | N |
|          | 24 S  | 0.199 | 0.469 | N |
|          | 32 T  | 0.342 | 0.053 | N |
|          | 39 T  | 0.226 | 0.093 | N |
|          | 46 S  | 0.127 | 0.056 | N |
|          | 57 T  | 0.189 | 0.032 | N |
|          | 66 T  | 0.189 | 0.06  | N |
|          | 77 S  | 0.199 | 0.032 | N |
|          | 81 S  | 0.237 | 0.057 | N |
|          | 85 S  | 0.216 | 0.052 | N |
|          | 92 S  | 0.288 | 0.045 | N |
|          | 94 S  | 0.277 | 0.029 | N |
|          | 95 T  | 0.365 | 0.078 | N |
|          | 101 T | 0.339 | 0.257 | N |
|          | 106 S | 0.207 | 0.019 | N |
|          | 113 S | 0.19  | 0.037 | N |
|          | 114 S | 0.184 | 0.022 | N |
|          | 128 T | 0.302 | 0.028 | N |
|          | 131 S | 0.222 | 0.062 | N |
|          | 150 S | 0.292 | 0.096 | N |
|          | 155 S | 0.317 | 0.047 | N |
|          | 157 T | 0.43  | 0.215 | N |
|          | 161 T | 0.369 | 0.048 | N |
|          | 167 T | 0.261 | 0.053 | N |
|          | 177 S | 0.186 | 0.05  | N |
|          | 187 S | 0.283 | 0.051 | N |
|          | 190 S | 0.292 | 0.094 | N |
|          | 191 T | 0.402 | 0.061 | N |
|          | 205 S | 0.274 | 0.021 | N |

|       |       |       |   |
|-------|-------|-------|---|
| 210 S | 0.179 | 0.054 | N |
| 211 S | 0.15  | 0.025 | N |
| 216 S | 0.132 | 0.038 | N |
| 218 T | 0.178 | 0.024 | N |
| 237 S | 0.16  | 0.043 | N |
| 243 T | 0.294 | 0.055 | N |
| 251 T | 0.329 | 0.077 | N |
| 255 S | 0.288 | 0.073 | N |
| 267 T | 0.283 | 0.053 | N |
| 268 S | 0.201 | 0.053 | N |
| 270 S | 0.169 | 0.026 | N |
| 277 S | 0.127 | 0.072 | N |
| 279 T | 0.201 | 0.045 | N |
| 290 T | 0.158 | 0.026 | N |
| 297 S | 0.09  | 0.086 | N |

---

<sup>1</sup>NetNGlyc 1.0 Serve (<http://www.cbs.dtu.dk/services/NetNGlyc/>)

<sup>2</sup>NetOGlyc 3.1 Server (<http://www.cbs.dtu.dk/services/NetOGlyc/>)
