# Supplementary material
Source: PubMed Central journal article supplement (PMC3359064)
Supplement: NIHMS376971-supplement-2_si_002.pdf [file NIHMS376971-supplement-2_si_002.pdf]

## Schneider et. al. Supporting Information Table S2

| Lectin                                             | Abrv. | Glycan Array Screen Identifier <sup>1</sup>                                                                                                                                                                                                                              | Hyperlink to Data                                                                                                                                                                                                                                                                                                                                                                                                                                                                                                                                                                                                                                                                                                                                                                                                                                                                                                                                                                                                                                                                                                                                                                                                                                                                                                                                                                                                                                                                                                                                                                                                                                                                                                                                                                                                                                                                                                                                                                                                                                                                                                                                                                                                                                                                                                                                                                                                                                                                                                                                                                                                                                                                                                                                                                                                                                                                                                                                          |
|----------------------------------------------------|-------|--------------------------------------------------------------------------------------------------------------------------------------------------------------------------------------------------------------------------------------------------------------------------|------------------------------------------------------------------------------------------------------------------------------------------------------------------------------------------------------------------------------------------------------------------------------------------------------------------------------------------------------------------------------------------------------------------------------------------------------------------------------------------------------------------------------------------------------------------------------------------------------------------------------------------------------------------------------------------------------------------------------------------------------------------------------------------------------------------------------------------------------------------------------------------------------------------------------------------------------------------------------------------------------------------------------------------------------------------------------------------------------------------------------------------------------------------------------------------------------------------------------------------------------------------------------------------------------------------------------------------------------------------------------------------------------------------------------------------------------------------------------------------------------------------------------------------------------------------------------------------------------------------------------------------------------------------------------------------------------------------------------------------------------------------------------------------------------------------------------------------------------------------------------------------------------------------------------------------------------------------------------------------------------------------------------------------------------------------------------------------------------------------------------------------------------------------------------------------------------------------------------------------------------------------------------------------------------------------------------------------------------------------------------------------------------------------------------------------------------------------------------------------------------------------------------------------------------------------------------------------------------------------------------------------------------------------------------------------------------------------------------------------------------------------------------------------------------------------------------------------------------------------------------------------------------------------------------------------------------------|
| <i>Erythrina cristagalli</i> lectin                | ECL   | primscreen_GLYCAN_v3_38_08302004                                                                                                                                                                                                                                         | <a href="http://www.functionalglycomics.org/glycomics/HServlet?operation=view&amp;sideMenu=no&amp;psId=primscreen_GLYCAN_v3_38_08302004">http://www.functionalglycomics.org/glycomics/HServlet?operation=view&amp;sideMenu=no&amp;psId=primscreen_GLYCAN_v3_38_08302004</a>                                                                                                                                                                                                                                                                                                                                                                                                                                                                                                                                                                                                                                                                                                                                                                                                                                                                                                                                                                                                                                                                                                                                                                                                                                                                                                                                                                                                                                                                                                                                                                                                                                                                                                                                                                                                                                                                                                                                                                                                                                                                                                                                                                                                                                                                                                                                                                                                                                                                                                                                                                                                                                                                                |
| Jacalin ( <i>Artocarpus integrifolia</i> )         | JAC   | primscreen_PA_v2_709_09262005<br>primscreen_PA_v2_360_11042005                                                                                                                                                                                                           | <a href="http://www.functionalglycomics.org/glycomics/HServlet?operation=view&amp;sideMenu=no&amp;psId=primscreen_PA_v2_709_09262005">http://www.functionalglycomics.org/glycomics/HServlet?operation=view&amp;sideMenu=no&amp;psId=primscreen_PA_v2_709_09262005</a><br><a href="http://www.functionalglycomics.org/glycomics/HServlet?operation=view&amp;sideMenu=no&amp;psId=primscreen_PA_v2_360_11042005">http://www.functionalglycomics.org/glycomics/HServlet?operation=view&amp;sideMenu=no&amp;psId=primscreen_PA_v2_360_11042005</a>                                                                                                                                                                                                                                                                                                                                                                                                                                                                                                                                                                                                                                                                                                                                                                                                                                                                                                                                                                                                                                                                                                                                                                                                                                                                                                                                                                                                                                                                                                                                                                                                                                                                                                                                                                                                                                                                                                                                                                                                                                                                                                                                                                                                                                                                                                                                                                                                             |
| <i>Vicia villosa</i> agglutinin                    | VVA   | primscreen_PA_v2_729_09262005                                                                                                                                                                                                                                            | <a href="http://www.functionalglycomics.org/glycomics/HServlet?operation=view&amp;sideMenu=no&amp;psId=primscreen_PA_v2_729_09262005">http://www.functionalglycomics.org/glycomics/HServlet?operation=view&amp;sideMenu=no&amp;psId=primscreen_PA_v2_729_09262005</a>                                                                                                                                                                                                                                                                                                                                                                                                                                                                                                                                                                                                                                                                                                                                                                                                                                                                                                                                                                                                                                                                                                                                                                                                                                                                                                                                                                                                                                                                                                                                                                                                                                                                                                                                                                                                                                                                                                                                                                                                                                                                                                                                                                                                                                                                                                                                                                                                                                                                                                                                                                                                                                                                                      |
| <i>Phaseolus vulgaris</i> erythroagglutinin        | PHA-E | primscreen_PA_v2_717_09262005                                                                                                                                                                                                                                            | <a href="http://www.functionalglycomics.org/glycomics/HServlet?operation=view&amp;sideMenu=no&amp;psId=primscreen_PA_v2_717_09262005">http://www.functionalglycomics.org/glycomics/HServlet?operation=view&amp;sideMenu=no&amp;psId=primscreen_PA_v2_717_09262005</a>                                                                                                                                                                                                                                                                                                                                                                                                                                                                                                                                                                                                                                                                                                                                                                                                                                                                                                                                                                                                                                                                                                                                                                                                                                                                                                                                                                                                                                                                                                                                                                                                                                                                                                                                                                                                                                                                                                                                                                                                                                                                                                                                                                                                                                                                                                                                                                                                                                                                                                                                                                                                                                                                                      |
| <i>Bordetella pertussis</i> toxin                  | PTx   | primscreen_1479<br>primscreen_1572<br>primscreen_1573<br>primscreen_1574<br>primscreen_1575<br>primscreen_1576<br>primscreen_1577<br>primscreen_2970<br>primscreen_2971<br>primscreen_2972<br>primscreen_2973<br>primscreen_2974                                         | <a href="http://www.functionalglycomics.org/glycomics/HServlet?operation=view&amp;sideMenu=no&amp;psId=primscreen_1479">http://www.functionalglycomics.org/glycomics/HServlet?operation=view&amp;sideMenu=no&amp;psId=primscreen_1479</a><br><a href="http://www.functionalglycomics.org/glycomics/HServlet?operation=view&amp;sideMenu=no&amp;psId=primscreen_1572">http://www.functionalglycomics.org/glycomics/HServlet?operation=view&amp;sideMenu=no&amp;psId=primscreen_1572</a><br><a href="http://www.functionalglycomics.org/glycomics/HServlet?operation=view&amp;sideMenu=no&amp;psId=primscreen_1573z">http://www.functionalglycomics.org/glycomics/HServlet?operation=view&amp;sideMenu=no&amp;psId=primscreen_1573z</a><br><a href="http://www.functionalglycomics.org/glycomics/HServlet?operation=view&amp;sideMenu=no&amp;psId=primscreen_1574">http://www.functionalglycomics.org/glycomics/HServlet?operation=view&amp;sideMenu=no&amp;psId=primscreen_1574</a><br><a href="http://www.functionalglycomics.org/glycomics/HServlet?operation=view&amp;sideMenu=no&amp;psId=primscreen_1575">http://www.functionalglycomics.org/glycomics/HServlet?operation=view&amp;sideMenu=no&amp;psId=primscreen_1575</a><br><a href="http://www.functionalglycomics.org/glycomics/HServlet?operation=view&amp;sideMenu=no&amp;psId=primscreen_1576">http://www.functionalglycomics.org/glycomics/HServlet?operation=view&amp;sideMenu=no&amp;psId=primscreen_1576</a><br><a href="http://www.functionalglycomics.org/glycomics/HServlet?operation=view&amp;sideMenu=no&amp;psId=primscreen_1577">http://www.functionalglycomics.org/glycomics/HServlet?operation=view&amp;sideMenu=no&amp;psId=primscreen_1577</a><br><a href="http://www.functionalglycomics.org/glycomics/HServlet?operation=view&amp;sideMenu=no&amp;psId=primscreen_2970">http://www.functionalglycomics.org/glycomics/HServlet?operation=view&amp;sideMenu=no&amp;psId=primscreen_2970</a><br><a href="http://www.functionalglycomics.org/glycomics/HServlet?operation=view&amp;sideMenu=no&amp;psId=primscreen_2971">http://www.functionalglycomics.org/glycomics/HServlet?operation=view&amp;sideMenu=no&amp;psId=primscreen_2971</a><br><a href="http://www.functionalglycomics.org/glycomics/HServlet?operation=view&amp;sideMenu=no&amp;psId=primscreen_2972">http://www.functionalglycomics.org/glycomics/HServlet?operation=view&amp;sideMenu=no&amp;psId=primscreen_2972</a><br><a href="http://www.functionalglycomics.org/glycomics/HServlet?operation=view&amp;sideMenu=no&amp;psId=primscreen_2973">http://www.functionalglycomics.org/glycomics/HServlet?operation=view&amp;sideMenu=no&amp;psId=primscreen_2973</a><br><a href="http://www.functionalglycomics.org/glycomics/HServlet?operation=view&amp;sideMenu=no&amp;psId=primscreen_2974">http://www.functionalglycomics.org/glycomics/HServlet?operation=view&amp;sideMenu=no&amp;psId=primscreen_2974</a> |
| Wheat germ agglutinin ( <i>Triticum aestivum</i> ) | WGA   | primscreen_PA_v2_731_09262005<br>primscreen_GLYCAN_v3_198_02142005<br>primscreen_GLYCAN_v3_202_02142005<br>primscreen_GLYCAN_v3_199_02142005<br>primscreen_GLYCAN_v2_25_10282003                                                                                         | <a href="http://www.functionalglycomics.org/glycomics/HServlet?operation=view&amp;sideMenu=no&amp;psId=primscreen_PA_v2_731_09262005">http://www.functionalglycomics.org/glycomics/HServlet?operation=view&amp;sideMenu=no&amp;psId=primscreen_PA_v2_731_09262005</a><br><a href="http://www.functionalglycomics.org/glycomics/HServlet?operation=view&amp;sideMenu=no&amp;psId=primscreen_GLYCAN_v3_198_02142005">http://www.functionalglycomics.org/glycomics/HServlet?operation=view&amp;sideMenu=no&amp;psId=primscreen_GLYCAN_v3_198_02142005</a><br><a href="http://www.functionalglycomics.org/glycomics/HServlet?operation=view&amp;sideMenu=no&amp;psId=primscreen_GLYCAN_v3_202_02142005">http://www.functionalglycomics.org/glycomics/HServlet?operation=view&amp;sideMenu=no&amp;psId=primscreen_GLYCAN_v3_202_02142005</a><br><a href="http://www.functionalglycomics.org/glycomics/HServlet?operation=view&amp;sideMenu=no&amp;psId=primscreen_GLYCAN_v3_199_02142005">http://www.functionalglycomics.org/glycomics/HServlet?operation=view&amp;sideMenu=no&amp;psId=primscreen_GLYCAN_v3_199_02142005</a><br><a href="http://www.functionalglycomics.org/glycomics/HServlet?operation=view&amp;sideMenu=no&amp;psId=primscreen_GLYCAN_v2_25_10282003">http://www.functionalglycomics.org/glycomics/HServlet?operation=view&amp;sideMenu=no&amp;psId=primscreen_GLYCAN_v2_25_10282003</a>                                                                                                                                                                                                                                                                                                                                                                                                                                                                                                                                                                                                                                                                                                                                                                                                                                                                                                                                                                                                                                                                                                                                                                                                                                                                                                                                                                                                                                                                                                                                                    |
| Soybean agglutinin ( <i>Glycine max</i> )          | SBA   | primscreen_PA_v2_724_09262005                                                                                                                                                                                                                                            | <a href="http://www.functionalglycomics.org/glycomics/HServlet?operation=view&amp;sideMenu=no&amp;psId=primscreen_PA_v2_724_09262005">http://www.functionalglycomics.org/glycomics/HServlet?operation=view&amp;sideMenu=no&amp;psId=primscreen_PA_v2_724_09262005</a>                                                                                                                                                                                                                                                                                                                                                                                                                                                                                                                                                                                                                                                                                                                                                                                                                                                                                                                                                                                                                                                                                                                                                                                                                                                                                                                                                                                                                                                                                                                                                                                                                                                                                                                                                                                                                                                                                                                                                                                                                                                                                                                                                                                                                                                                                                                                                                                                                                                                                                                                                                                                                                                                                      |
| <i>Ricinus communis</i> agglutinin                 | RCA   | primscreen_2793<br>primscreen_PA_v2.1_600_09202006<br>primscreen_PA_v2.1_601_09202006<br>primscreen_PA_v2.1_599_09202006<br>primscreen_PA_v2_723_09262005<br>primscreen_GLYCAN_v3_205_02142005<br>primscreen_GLYCAN_v3_201_02142005<br>primscreen_GLYCAN_v3_204_02142005 | <a href="http://www.functionalglycomics.org/glycomics/HServlet?operation=view&amp;sideMenu=no&amp;psId=primscreen_2793">http://www.functionalglycomics.org/glycomics/HServlet?operation=view&amp;sideMenu=no&amp;psId=primscreen_2793</a><br><a href="http://www.functionalglycomics.org/glycomics/HServlet?operation=view&amp;sideMenu=no&amp;psId=primscreen_PA_v2.1_600_09202006">http://www.functionalglycomics.org/glycomics/HServlet?operation=view&amp;sideMenu=no&amp;psId=primscreen_PA_v2.1_600_09202006</a><br><a href="http://www.functionalglycomics.org/glycomics/HServlet?operation=view&amp;sideMenu=no&amp;psId=primscreen_PA_v2.1_601_09202006">http://www.functionalglycomics.org/glycomics/HServlet?operation=view&amp;sideMenu=no&amp;psId=primscreen_PA_v2.1_601_09202006</a><br><a href="http://www.functionalglycomics.org/glycomics/HServlet?operation=view&amp;sideMenu=no&amp;psId=primscreen_PA_v2.1_599_09202006">http://www.functionalglycomics.org/glycomics/HServlet?operation=view&amp;sideMenu=no&amp;psId=primscreen_PA_v2.1_599_09202006</a><br><a href="http://www.functionalglycomics.org/glycomics/HServlet?operation=view&amp;sideMenu=no&amp;psId=primscreen_PA_v2_723_09262005">http://www.functionalglycomics.org/glycomics/HServlet?operation=view&amp;sideMenu=no&amp;psId=primscreen_PA_v2_723_09262005</a><br><a href="http://www.functionalglycomics.org/glycomics/HServlet?operation=view&amp;sideMenu=no&amp;psId=primscreen_GLYCAN_v3_205_02142005">http://www.functionalglycomics.org/glycomics/HServlet?operation=view&amp;sideMenu=no&amp;psId=primscreen_GLYCAN_v3_205_02142005</a><br><a href="http://www.functionalglycomics.org/glycomics/HServlet?operation=view&amp;sideMenu=no&amp;psId=primscreen_GLYCAN_v3_201_02142005">http://www.functionalglycomics.org/glycomics/HServlet?operation=view&amp;sideMenu=no&amp;psId=primscreen_GLYCAN_v3_201_02142005</a><br><a href="http://www.functionalglycomics.org/glycomics/HServlet?operation=view&amp;sideMenu=no&amp;psId=primscreen_GLYCAN_v3_204_02142005">http://www.functionalglycomics.org/glycomics/HServlet?operation=view&amp;sideMenu=no&amp;psId=primscreen_GLYCAN_v3_204_02142005</a>                                                                                                                                                                                                                                                                                                                                                                                                                                                                                                                                                                                                                                                                                                                                               |
| <i>Phaseolus vulgaris</i> leucoagglutinin          | PHA-L | primscreen_PA_v2_718_09262005<br>primscreen_GLYCAN_v3_194_02142005<br>primscreen_GLYCAN_v3_192_02142005<br>primscreen_GLYCAN_v3_191_02142005                                                                                                                             | <a href="http://www.functionalglycomics.org/glycomics/HServlet?operation=view&amp;sideMenu=no&amp;psId=primscreen_PA_v2_718_09262005">http://www.functionalglycomics.org/glycomics/HServlet?operation=view&amp;sideMenu=no&amp;psId=primscreen_PA_v2_718_09262005</a><br><a href="http://www.functionalglycomics.org/glycomics/HServlet?operation=view&amp;sideMenu=no&amp;psId=primscreen_GLYCAN_v3_194_02142005">http://www.functionalglycomics.org/glycomics/HServlet?operation=view&amp;sideMenu=no&amp;psId=primscreen_GLYCAN_v3_194_02142005</a><br><a href="http://www.functionalglycomics.org/glycomics/HServlet?operation=view&amp;sideMenu=no&amp;psId=primscreen_GLYCAN_v3_192_02142005">http://www.functionalglycomics.org/glycomics/HServlet?operation=view&amp;sideMenu=no&amp;psId=primscreen_GLYCAN_v3_192_02142005</a><br><a href="http://www.functionalglycomics.org/glycomics/HServlet?operation=view&amp;sideMenu=no&amp;psId=primscreen_GLYCAN_v3_191_02142005">http://www.functionalglycomics.org/glycomics/HServlet?operation=view&amp;sideMenu=no&amp;psId=primscreen_GLYCAN_v3_191_02142005</a>                                                                                                                                                                                                                                                                                                                                                                                                                                                                                                                                                                                                                                                                                                                                                                                                                                                                                                                                                                                                                                                                                                                                                                                                                                                                                                                                                                                                                                                                                                                                                                                                                                                                                                                                                                                                                                   |
| <i>Datura stramonium</i> lectin                    | DSL   | primscreen_PA_v2_702_09262005                                                                                                                                                                                                                                            | <a href="http://www.functionalglycomics.org/glycomics/HServlet?operation=view&amp;sideMenu=no&amp;psId=primscreen_PA_v2_702_09262005">http://www.functionalglycomics.org/glycomics/HServlet?operation=view&amp;sideMenu=no&amp;psId=primscreen_PA_v2_702_09262005</a>                                                                                                                                                                                                                                                                                                                                                                                                                                                                                                                                                                                                                                                                                                                                                                                                                                                                                                                                                                                                                                                                                                                                                                                                                                                                                                                                                                                                                                                                                                                                                                                                                                                                                                                                                                                                                                                                                                                                                                                                                                                                                                                                                                                                                                                                                                                                                                                                                                                                                                                                                                                                                                                                                      |
| <i>Lens culinaris</i> agglutinin                   | LCA   | primscreen_PA_v2_710_09262005                                                                                                                                                                                                                                            | <a href="http://www.functionalglycomics.org/glycomics/HServlet?operation=view&amp;sideMenu=no&amp;psId=primscreen_PA_v2_710_09262005">http://www.functionalglycomics.org/glycomics/HServlet?operation=view&amp;sideMenu=no&amp;psId=primscreen_PA_v2_710_09262005</a>                                                                                                                                                                                                                                                                                                                                                                                                                                                                                                                                                                                                                                                                                                                                                                                                                                                                                                                                                                                                                                                                                                                                                                                                                                                                                                                                                                                                                                                                                                                                                                                                                                                                                                                                                                                                                                                                                                                                                                                                                                                                                                                                                                                                                                                                                                                                                                                                                                                                                                                                                                                                                                                                                      |
| <i>Pisum sativum</i> agglutinin                    | PSA   | primscreen_PA_v2_720_09262005                                                                                                                                                                                                                                            | <a href="http://www.functionalglycomics.org/glycomics/HServlet?operation=view&amp;sideMenu=no&amp;psId=primscreen_PA_v2_720_09262005">http://www.functionalglycomics.org/glycomics/HServlet?operation=view&amp;sideMenu=no&amp;psId=primscreen_PA_v2_720_09262005</a>                                                                                                                                                                                                                                                                                                                                                                                                                                                                                                                                                                                                                                                                                                                                                                                                                                                                                                                                                                                                                                                                                                                                                                                                                                                                                                                                                                                                                                                                                                                                                                                                                                                                                                                                                                                                                                                                                                                                                                                                                                                                                                                                                                                                                                                                                                                                                                                                                                                                                                                                                                                                                                                                                      |
| Concanavalin A ( <i>Canavalia ensiformis</i> )     | ConA  | primscreen_PA_v2_700_09262005<br>primscreen_PA_v2_357_10312005<br>primscreen_4413<br>primscreen_4414<br>primscreen_4415                                                                                                                                                  | <a href="http://www.functionalglycomics.org/glycomics/HServlet?operation=view&amp;sideMenu=no&amp;psId=primscreen_PA_v2_700_09262005">http://www.functionalglycomics.org/glycomics/HServlet?operation=view&amp;sideMenu=no&amp;psId=primscreen_PA_v2_700_09262005</a><br><a href="http://www.functionalglycomics.org/glycomics/HServlet?operation=view&amp;sideMenu=no&amp;psId=primscreen_PA_v2_357_10312005">http://www.functionalglycomics.org/glycomics/HServlet?operation=view&amp;sideMenu=no&amp;psId=primscreen_PA_v2_357_10312005</a><br><a href="http://www.functionalglycomics.org/glycomics/HServlet?operation=view&amp;sideMenu=no&amp;psId=primscreen_4413">http://www.functionalglycomics.org/glycomics/HServlet?operation=view&amp;sideMenu=no&amp;psId=primscreen_4413</a><br><a href="http://www.functionalglycomics.org/glycomics/HServlet?operation=view&amp;sideMenu=no&amp;psId=primscreen_4414">http://www.functionalglycomics.org/glycomics/HServlet?operation=view&amp;sideMenu=no&amp;psId=primscreen_4414</a><br><a href="http://www.functionalglycomics.org/glycomics/HServlet?operation=view&amp;sideMenu=no&amp;psId=primscreen_4415">http://www.functionalglycomics.org/glycomics/HServlet?operation=view&amp;sideMenu=no&amp;psId=primscreen_4415</a>                                                                                                                                                                                                                                                                                                                                                                                                                                                                                                                                                                                                                                                                                                                                                                                                                                                                                                                                                                                                                                                                                                                                                                                                                                                                                                                                                                                                                                                                                                                                                                                                                                                                      |

|                                               |        |                                  |                                                                                                                                                                                                                                                                             |
|-----------------------------------------------|--------|----------------------------------|-----------------------------------------------------------------------------------------------------------------------------------------------------------------------------------------------------------------------------------------------------------------------------|
| <i>Griffonia simplicifolia</i> lectin II      | GSL II | primscreen_PA_v2_707_09262005    | <a href="http://www.functionalglycomics.org/glycomics/HServlet?operation=view&amp;sideMenu=no&amp;psId=primscreen_PA_v2_707_09262005">http://www.functionalglycomics.org/glycomics/HServlet?operation=view&amp;sideMenu=no&amp;psId=primscreen_PA_v2_707_09262005</a>       |
| <i>Lycopersicon esculentum</i> lectin         | LEL    | primscreen_PA_v2_711_09262005    | <a href="http://www.functionalglycomics.org/glycomics/HServlet?operation=view&amp;sideMenu=no&amp;psId=primscreen_PA_v2_711_09262005">http://www.functionalglycomics.org/glycomics/HServlet?operation=view&amp;sideMenu=no&amp;psId=primscreen_PA_v2_711_09262005</a>       |
| <i>Dolichos biflorus</i> Agglutinin           | DBA    | primscreen_PA_v2_701_09262005    | <a href="http://www.functionalglycomics.org/glycomics/HServlet?operation=view&amp;sideMenu=no&amp;psId=primscreen_PA_v2_701_09262005">http://www.functionalglycomics.org/glycomics/HServlet?operation=view&amp;sideMenu=no&amp;psId=primscreen_PA_v2_701_09262005</a>       |
| Peanut Agglutinin ( <i>Arachis hypogaea</i> ) | PNA    | primscreen_PA_v2_719_09262005    | <a href="http://www.functionalglycomics.org/glycomics/HServlet?operation=view&amp;sideMenu=no&amp;psId=primscreen_PA_v2_719_09262005">http://www.functionalglycomics.org/glycomics/HServlet?operation=view&amp;sideMenu=no&amp;psId=primscreen_PA_v2_719_09262005</a>       |
|                                               |        | primscreen_4389                  | <a href="http://www.functionalglycomics.org/glycomics/HServlet?operation=view&amp;sideMenu=no&amp;psId=primscreen_4389">http://www.functionalglycomics.org/glycomics/HServlet?operation=view&amp;sideMenu=no&amp;psId=primscreen_4389</a>                                   |
|                                               |        | primscreen_4376                  | <a href="http://www.functionalglycomics.org/glycomics/HServlet?operation=view&amp;sideMenu=no&amp;psId=primscreen_4376">http://www.functionalglycomics.org/glycomics/HServlet?operation=view&amp;sideMenu=no&amp;psId=primscreen_4376</a>                                   |
|                                               |        | primscreen_4390                  | <a href="http://www.functionalglycomics.org/glycomics/HServlet?operation=view&amp;sideMenu=no&amp;psId=primscreen_4390">http://www.functionalglycomics.org/glycomics/HServlet?operation=view&amp;sideMenu=no&amp;psId=primscreen_4390</a>                                   |
|                                               |        | primscreen_PA_v1_366_08312005    | <a href="http://www.functionalglycomics.org/glycomics/HServlet?operation=view&amp;sideMenu=no&amp;psId=primscreen_PA_v1_366_08312005">http://www.functionalglycomics.org/glycomics/HServlet?operation=view&amp;sideMenu=no&amp;psId=primscreen_PA_v1_366_08312005</a>       |
| <i>Sophora japonica</i> agglutinin            | SJA    | primscreen_GLYCAN_v3_60_09172004 | <a href="http://www.functionalglycomics.org/glycomics/HServlet?operation=view&amp;sideMenu=no&amp;psId=primscreen_GLYCAN_v3_60_09172004">http://www.functionalglycomics.org/glycomics/HServlet?operation=view&amp;sideMenu=no&amp;psId=primscreen_GLYCAN_v3_60_09172004</a> |
|                                               |        | primscreen_PA_v2_725_09262005    | <a href="http://www.functionalglycomics.org/glycomics/HServlet?operation=view&amp;sideMenu=no&amp;psId=primscreen_PA_v2_725_09262005">http://www.functionalglycomics.org/glycomics/HServlet?operation=view&amp;sideMenu=no&amp;psId=primscreen_PA_v2_725_09262005</a>       |
| <i>Ulex europaeus</i> agglutinin              | UEA-I  | primscreen_PA_v2_728_09262005    | <a href="http://www.functionalglycomics.org/glycomics/HServlet?operation=view&amp;sideMenu=no&amp;psId=primscreen_PA_v2_728_09262005">http://www.functionalglycomics.org/glycomics/HServlet?operation=view&amp;sideMenu=no&amp;psId=primscreen_PA_v2_728_09262005</a>       |
|                                               |        | primscreen_4419                  | <a href="http://www.functionalglycomics.org/glycomics/HServlet?operation=view&amp;sideMenu=no&amp;psId=primscreen_4419">http://www.functionalglycomics.org/glycomics/HServlet?operation=view&amp;sideMenu=no&amp;psId=primscreen_4419</a>                                   |
|                                               |        | primscreen_4420                  | <a href="http://www.functionalglycomics.org/glycomics/HServlet?operation=view&amp;sideMenu=no&amp;psId=primscreen_4420">http://www.functionalglycomics.org/glycomics/HServlet?operation=view&amp;sideMenu=no&amp;psId=primscreen_4420</a>                                   |

---

<sup>1</sup> Consortium for Functional Glycomics (<http://www.functionalglycomics.org>)
