# Supplementary material
Source: PubMed Central journal article supplement (PMC3359064)
Supplement: NIHMS376971-supplement-3_si_003.pdf [file NIHMS376971-supplement-3_si_003.pdf]

### Schneider et. al. Supporting Information Table S3

| Species             | Cell Type | Glycan                            | Glycan Profiling by MS <sup>1</sup>                                                                                                                       | Hyperlink to Data <sup>1</sup>                                                                                                                                                                                              |
|---------------------|-----------|-----------------------------------|-----------------------------------------------------------------------------------------------------------------------------------------------------------|-----------------------------------------------------------------------------------------------------------------------------------------------------------------------------------------------------------------------------|
| <i>Homo sapiens</i> | T-cell    | N-glycan, Low Molecular Weight    | <a href="http://www.functionalglycomics.org/coreCStatic/allgiffiles/211_lm.gif">http://www.functionalglycomics.org/coreCStatic/allgiffiles/211_lm.gif</a> | <a href="http://www.functionalglycomics.org/glycomics/publicdata/viewGlycoProfilingSampleData.jsp?sampleKey=211">http://www.functionalglycomics.org/glycomics/publicdata/viewGlycoProfilingSampleData.jsp?sampleKey=211</a> |
|                     |           | N-glycan, Medium Molecular Weight | <a href="http://www.functionalglycomics.org/coreCStatic/allgiffiles/211_mm.gif">http://www.functionalglycomics.org/coreCStatic/allgiffiles/211_mm.gif</a> | <a href="http://www.functionalglycomics.org/glycomics/publicdata/viewGlycoProfilingSampleData.jsp?sampleKey=211">http://www.functionalglycomics.org/glycomics/publicdata/viewGlycoProfilingSampleData.jsp?sampleKey=211</a> |
|                     |           | N-glycan, High Molecular Weight   | <a href="http://www.functionalglycomics.org/coreCStatic/allgiffiles/211_hm.gif">http://www.functionalglycomics.org/coreCStatic/allgiffiles/211_hm.gif</a> | <a href="http://www.functionalglycomics.org/glycomics/publicdata/viewGlycoProfilingSampleData.jsp?sampleKey=211">http://www.functionalglycomics.org/glycomics/publicdata/viewGlycoProfilingSampleData.jsp?sampleKey=211</a> |
|                     |           | O-glycan                          | <a href="http://www.functionalglycomics.org/coreCStatic/allgiffiles/212.gif">http://www.functionalglycomics.org/coreCStatic/allgiffiles/212.gif</a>       | <a href="http://www.functionalglycomics.org/glycomics/publicdata/viewGlycoProfilingSampleData.jsp?sampleKey=212">http://www.functionalglycomics.org/glycomics/publicdata/viewGlycoProfilingSampleData.jsp?sampleKey=212</a> |

<sup>1</sup> Consortium for Functional Glycomics (<http://www.functionalglycomics.org>)
